# Supplementary material
Source: PubMed Central journal article supplement (PMC3122556)
Supplement: supp_18_4_676__1.pdf [file supp_18_4_676__1.pdf]

**Supplementary Table 1. Overlapping peptide sets of *Mtb* Rpf antigens.**

**S-1A Overlapping peptide set of Rv0867c**

| Peptide number | Rv0867c aa sequence   | Position start-end |
|----------------|-----------------------|--------------------|
| 1              | MSGRHRKPTTSNVSVAKIAF  | 1-20               |
| 2              | SNVSVAKIAFTGAVLGGGGI  | 11-30              |
| 3              | TGAVLGGGGIAMAQAATAAT  | 21-40              |
| 4              | AMAAQATAATDGEWDQVARC  | 31-50              |
| 5              | DGEWDQVARCESGGNWSINT  | 41-60              |
| 6              | ESGGNWSINTGNGYLGGLQF  | 51-70              |
| 7              | GNGYLGGLQFTQSTWAAHGG  | 61-80              |
| 8              | TQSTWAAHGGGEFAPSAQLA  | 71-90              |
| 9              | GEFAPSAQLASREQQIAVGE  | 81-100             |
| 10             | SREQQIAVGERVLATQGRGA  | 91-110             |
| 11             | RVLATQGRGAWPVCGRGLSN  | 101-120            |
| 12             | WPVCGRGLSNATPREVLPAAS | 111-130            |
| 13             | ATPREVLPAASAMPAPLDAA  | 121-140            |
| 14             | AAMPAPLDAAAVNGEPAPLA  | 131-150            |
| 15             | AVNGEPAPLAPPADPAPPV   | 141-160            |
| 16             | PPADPAPPVELAANDLPAP   | 151-170            |
| 17             | ELAANDLPAPLGEPLPAAPA  | 161-180            |
| 18             | LGEPLPAAPADPAPPADLAP  | 171-190            |
| 19             | DPAPPADLAPPAPADVAPPV  | 181-200            |
| 20             | PAPADVAPPVELAVNDLPAP  | 191-210            |
| 21             | ELAVNDLPAPLGEPLPAAPA  | 201-220            |
| 22             | LGEPLPAAPADPAPPADLAP  | 211-230            |
| 23             | DPAPPADLAPPAPADLAPPA  | 221-240            |
| 24             | PAPADLAPPAPADLAPPAPA  | 231-250            |
| 25             | PADLAPPAPADLAPPVELAV  | 241-260            |
| 26             | DLAPPVELAVNDLPAPLGEPL | 251-270            |
| 27             | NLDPAPLGEPLPAAPAEELAP | 261-280            |
| 28             | LPAAPAEELAPPADLAPASAD | 271-290            |
| 29             | PADLAPASADLAPPAPADLA  | 281-300            |
| 30             | LAPPAPADLAPPAPAEELAPP | 291-310            |
| 31             | PPAPAEELAPPAPADLAPPAA | 301-320            |
| 32             | APADLAPPAAVNEQTAPGDQ  | 311-330            |
| 33             | VNEQTAPGDQPATAPGGPVG  | 321-340            |
| 34             | PATAPGGPVGLATDLELPEP  | 331-350            |
| 35             | LATDLELPEPDPQADAPP    | 341-360            |
| 36             | DPQADAPPDVTTEAPAET    | 351-370            |
| 37             | GDVTEAPAETPQVSNIAYTK  | 361-380            |
| 38             | PQVSNIAYTKKLWQAIRAQD  | 371-390            |
| 39             | KLWQAIRAQDVCNDALDSL   | 381-400            |
| 40             | AQDVCNDALDSLAPFYVIG   | 388-407            |

**S-1B Overlapping peptide set of Rv2389c**

| Peptide number | Rv2389c aa sequence  | Position start-end |
|----------------|----------------------|--------------------|
| 1              | MTPGLLTAGAGRPRDRCAR  | 1-20               |
| 2              | AGRPRDRCARIVCTVFIETA | 11-30              |
| 3              | IVCTVFIETAVVATMFVALL | 21-40              |
| 4              | VVATMFVALLGLSTISSKAD | 31-50              |
| 5              | GLSTISSKADDIDWDAIAQC | 41-60              |
| 6              | DIDWDAIAQCESGGNWAANT | 51-70              |
| 7              | ESGGNWAANTGNGLYGGLQI | 61-80              |
| 8              | GNGLYGGLQISQATWDSNGG | 71-90              |
| 9              | SQATWDSNGGVSPAAASPQ  | 81-100             |
| 10             | VGSPAAASPQQIEVADNIM  | 91-110             |
| 11             | QQIEVADNIMKTQGGPAPWK | 101-120            |
| 12             | KTQGGPAPWKSSCSQGDAP  | 111-130            |
| 13             | CSSCSQGDAPLGLTHILTF  | 121-140            |
| 14             | LGLTHILTFLLAAETGGCSG | 131-150            |
| 15             | THILTFLLAAETGGCSGRDD | 141-160            |
